# Supplementary material for: Type 2 Diabetes Mellitus Facilitates Shift of Adipose-Derived Stem Cells Ex Vivo Differentiation toward Osteogenesis among Patients with Obesity
Source: MDPI journal article supplement (doi:10.3390/life12050688), 2022-05-06
Supplement: s1 [file s1]

## Article

# Type 2 diabetes mellitus facilitates shift of adipose-derived stem cells differentiation toward osteogenesis among obese individuals

Margarita Agareva <sup>1,2</sup>, Iurii Stafeev <sup>2,\*</sup>, Svetlana Michurina <sup>2,3</sup>, Igor Sklyanik <sup>4</sup>, Ekaterina Shestakova <sup>4</sup>, Elizaveta Ratner <sup>2</sup>, Xiang Hu <sup>5</sup>, Mikhail Menshikov <sup>2</sup>, Marina Shestakova <sup>4</sup> and Yelena Parfyonova <sup>2,6</sup>

Supplementary Table S1. Characterization of patients which participated in the study. Data are presented as median  $\pm$  SEM, Mann-Whitney rank sum U-test, statistically significance threshold  $p < 0.05$ . N/A - non applicable.

| Parameter              | NGT              | T2DM             | p      |
|------------------------|------------------|------------------|--------|
| Sex, female:male       | 3:0              | 3:0              | N/A    |
| Age, years             | 46 $\pm$ 2.28    | 52 $\pm$ 4.46    | 0.4307 |
| Body weight, kg        | 118 $\pm$ 9.6    | 113 $\pm$ 3.2    | 0.5    |
| BMI, kg/m <sup>2</sup> | 45.84 $\pm$ 0.85 | 40.18 $\pm$ 1.42 | 0.0103 |
| HOMA-IR, a.u.          | 5.99 $\pm$ 1.97  | 5.89 $\pm$ 1.03  | 0.9    |
| M-index, mg/kg/min     | 5.35 $\pm$ 0.62  | 1.44 $\pm$ 0.12  | 0.0022 |
| HbA1c, %               | 5.7 $\pm$ 0.11   | 6.7 $\pm$ 0.21   | 0.0022 |
| FBG, mM                | 4.96 $\pm$ 0.19  | 7.55 $\pm$ 0.63  | 0.0017 |

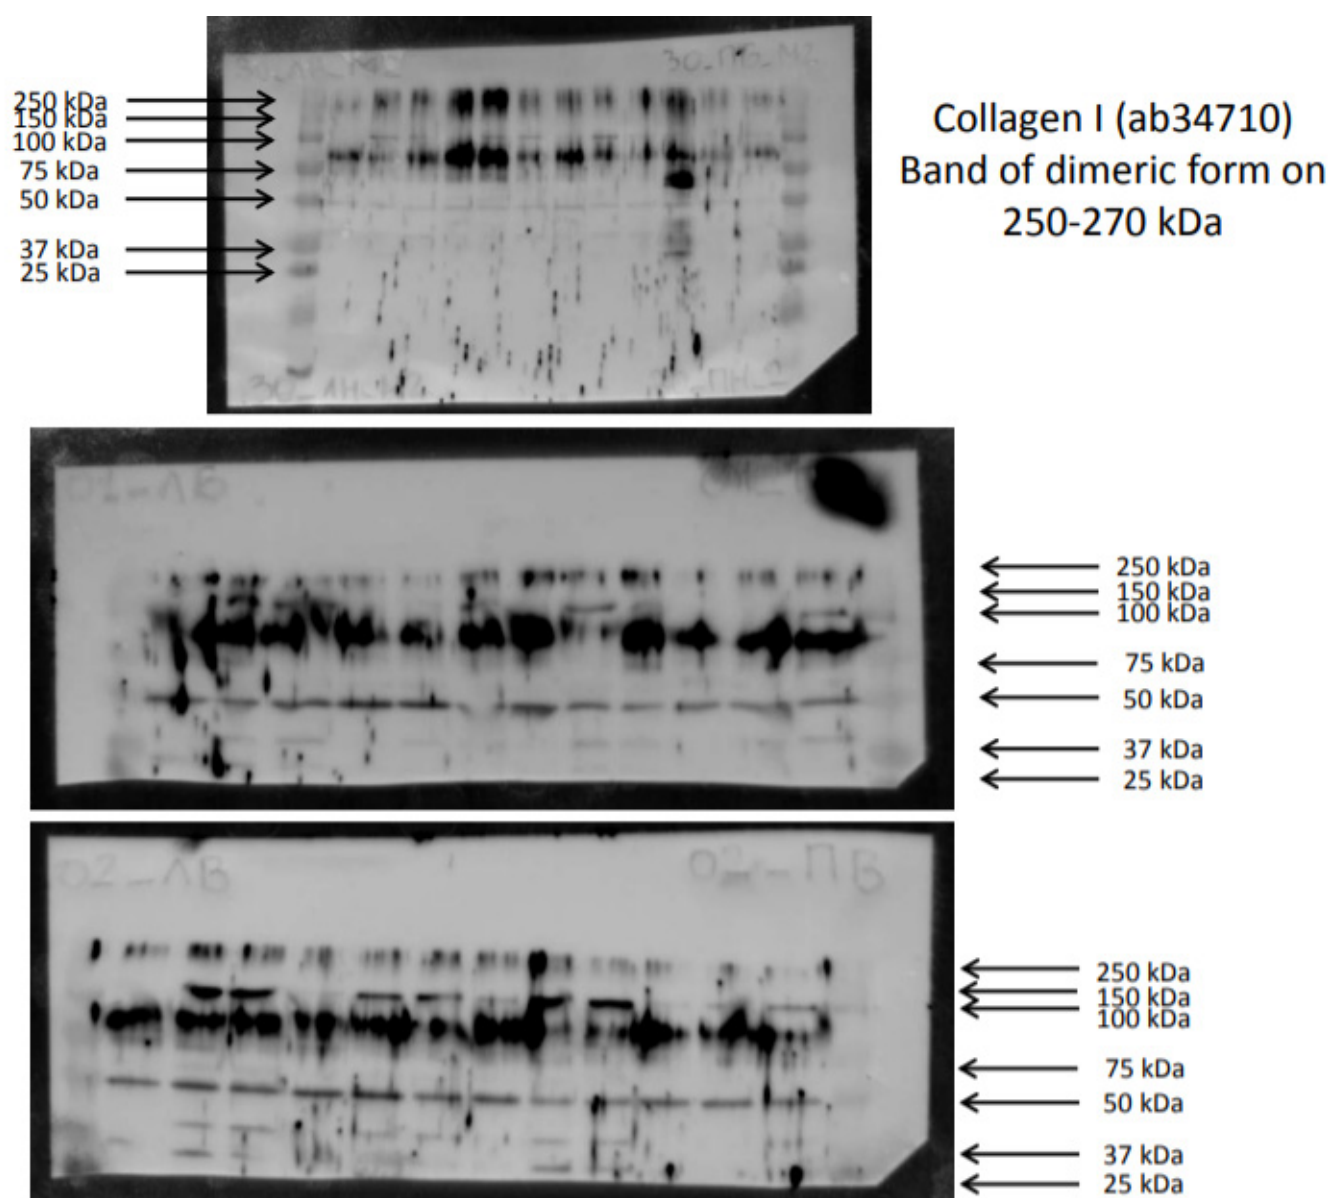

Figure S1. Uncropped images for WB.
